# Supplementary material for: Talent identification and recruitment in youth soccer: Recruiter’s perceptions of the key attributes for player recruitment
Source: PLoS One. 2017 Apr 18;12(4):e0175716. doi: 10.1371/journal.pone.0175716 (PMC5395184; doi:10.1371/journal.pone.0175716)
Supplement: S1 Dataset — (XLSX) [file pone.0175716.s002.xlsx]

## Sheet: Sheet1
ATTRIBUTES	Participants																		TOTAL AVERAGE	TOTAL SD
First Touch	9	9	8	8	9	7	8	8	9	8	8	8	9	9	9	9	9	9	8.5	0.618347
Striking The Ball	6	9	8	8	9	8	8	7	9	8	8	6	9	7	8	9	6	7	7.77778	1.06027
1 v 1	8	8	8	8	9		8	7	7	7	7	6	9	7	7	9	8	9	7.76471	0.903425
Coachability	5	8	9	8	9	6	9	8	8	9	7	6	9	9	8	9	5	7	7.72222	1.4061
Decision-making	4	8	9	7	9	8	8	7	8	6	7	9	9	8	8	9	7	6	7.61111	1.33456
Love Of The Game	5	9	9	6	9	6	9	7	7	9	3	9	9	9	9	4	5	9	7.38889	2.06195
Technique Under Pressure	6	7	8	8	9	8	7	8	8	8	8	8	2	8	7		7	8	7.35294	1.53872
Running With The Ball	7	8	8	8	9		8	6	7	7	7	6	9	6	7	9	7	6	7.35294	1.05719
X-Factor	7	6	9	7	9		9	8	8	5	9	8		6	6	3	8	7	7.1875	1.68201
Positive Attitude	6	9	8	6	9	7	8		6	7			8	9	6	4	6	7	7.06667	1.43759
Confidence	6	9	8	6	9	5	6	8	8	8	6	6	5	9	6	4	6	9	6.88889	1.60473
General Game Understanding	4	9	8	6	9	7	3	7	7	5			8	8	7	7	4	5	6.5	1.82574
Competitive	3	8	8	7	9	6	8	8	6	5	5	7	9	9	7	1	3	8	6.5	2.30728
Game Sense/Awareness	3	6	8	5	9	6	3	5	7	5	7	8	7	9	9	5	5	7	6.33333	1.87867
Anticipation		6	8	7	8	6	5	5	6	7	7	8	7	8	6	7		0	6.3125	1.95683
Personality/Character	0	8	8	5	8	3	9	3	6	6	3		9	9	6	9		8	6.25	2.76887
Consistent Execution	5	6	8	6	9	6	7	5	9	8	6	7	9	8	5	0	6	0	6.11111	2.60969
Vision	4	6	8	7	9	4	6	6	8	6	7		2	7	6	2	5	6	5.82353	1.94407
Adaptability	3	6	8	7	5	4	6	7	6	7	5		7	8	6	1	4	9	5.82353	2.00734
Agility/Balance	0	7	8	8	8	6	0	6		7	5	7	9	8	5	7	0	7	5.76471	2.94808
Team Understanding	4	5	6	6	9	4	3	5	6	6		3	9	9	7	2	4	5	5.47059	2.12478
Concentration	0	7	8	6	9	5	3	6		8	5	6	8	7	6	4	0	5	5.47059	2.57676
Defensive Ability	4	5	6	6	8		3	2	7	7	6	6	5	6	7	5	4	3	5.29412	1.64942
Professionalism	0		7	6	9	5	6	1	6	4	4	5	9	9	6	4	0	5	5.05882	2.79443
Communication	0	7	7	3	9	3	6	5	7	4	5		8	9	6	3	0	3	5	2.76134
Speed	0	7	8	7	5	7	0	4		3	3	6	5	8	6	7	0	6	4.82353	2.74398
Pressure	0	5	8	5	7		0	7	7	4		6	8	8	7	3	0	0	4.6875	3.13515
Strength	0	3	7	4	5	2	0	0		2	3	2	0	6	5	3	0	0	2.47059	2.32157
Short Stature	0	3	6	0	0	0	0	0	6	0		0	2	1	3	0	0	0	1.23529	2.07754

## Sheet: Sheet3
ATTRIBUTES	Participants																		TOTAL AVERAGE
First Touch	9	9	8	8	9	7	8	8	9	8	8	8	9	9	9	9	9	9	8.5
Striking The Ball	6	9	8	8	9	8	8	7	9	8	8	6	9	7	8	9	6	7	7.77778
1 v 1	8	8	8	8	9		8	7	7	7	7	6	9	7	7	9	8	9	7.76471
Coachability	5	8	9	8	9	6	9	8	8	9	7	6	9	9	8	9	5	7	7.72222
Decision-making	4	8	9	7	9	8	8	7	8	6	7	9	9	8	8	9	7	6	7.61111
Love Of The Game	5	9	9	6	9	6	9	7	7	9	3	9	9	9	9	4	5	9	7.38889
Technique Under Pressure	6	7	8	8	9	8	7	8	8	8	8	8	2	8	7		7	8	7.35294
Running With The Ball	7	8	8	8	9		8	6	7	7	7	6	9	6	7	9	7	6	7.35294
X-Factor	7	6	9	7	9		9	8	8	5	9	8		6	6	3	8	7	7.1875
Positive Attitude	6	9	8	6	9	7	8		6	7			8	9	6	4	6	7	7.06667
Confidence	6	9	8	6	9	5	6	8	8	8	6	6	5	9	6	4	6	9	6.88889
General Game Understanding	4	9	8	6	9	7	3	7	7	5			8	8	7	7	4	5	6.5
Competitive	3	8	8	7	9	6	8	8	6	5	5	7	9	9	7	1	3	8	6.5
Game Sense/Awareness	3	6	8	5	9	6	3	5	7	5	7	8	7	9	9	5	5	7	6.33333
Anticipation		6	8	7	8	6	5	5	6	7	7	8	7	8	6	7		0	6.3125
Consistent Execution	5	6	8	6	9	6	7	5	9	8	6	7	9	8	5	0	6	0	6.11111
Personality/Character	0	8	8	5	8	3	9	3	6	6	3		9	9	6	9		8	6.25
Vision	4	6	8	7	9	4	6	6	8	6	7		2	7	6	2	5	6	5.82353
Adaptability	3	6	8	7	5	4	6	7	6	7	5		7	8	6	1	4	9	5.82353
Agility/Balance	0	7	8	8	8	6	0	6		7	5	7	9	8	5	7	0	7	5.76471
Team Understanding	4	5	6	6	9	4	3	5	6	6		3	9	9	7	2	4	5	5.47059
Concentration	0	7	8	6	9	5	3	6		8	5	6	8	7	6	4	0	5	5.47059
Defensive Ability	4	5	6	6	8		3	2	7	7	6	6	5	6	7	5	4	3	5.29412
Professionalism	0		7	6	9	5	6	1	6	4	4	5	9	9	6	4	0	5	5.05882
Communication	0	7	7	3	9	3	6	5	7	4	5		8	9	6	3	0	3	5
Speed	0	7	8	7	5	7	0	4		3	3	6	5	8	6	7	0	6	4.82353
Pressure	0	5	8	5	7		0	7	7	4		6	8	8	7	3	0	0	4.6875
Strength	0	3	7	4	5	2	0	0		2	3	2	0	6	5	3	0	0	2.47059
Short Stature	0	3	6	0	0	0	0	0	6	0		0	2	1	3	0	0	0	1.23529
